# Supplementary material for: Effects of Inundation, Nutrient Availability and Plant Species Diversity on Fine Root Mass and Morphology Across a Saltmarsh Flooding Gradient
Source: PubMed Central journal article supplement (PMC5808222; doi:10.3389/fpls.2018.00098), 2018-02-06
Supplement: DataSheet2.pdf [file DataSheet2.pdf]

## *Supplementary Material*

### **Effects of inundation, nutrient availability and plant species diversity on fine root mass and morphology across a saltmarsh flooding gradient**

**Regine Redelstein\*, Thomas Dinter, Dietrich Hertel, Christoph Leuschner**

\* **Correspondence:** Regine Redelstein: [regine.redelstein@biologie.uni-goettingen.de](mailto:regine.redelstein@biologie.uni-goettingen.de)

**Supplementary Material 4:** Data on above- and below-ground biomass at two saltmarsh sites (R. Strieckmann 1989, unpubl. data)

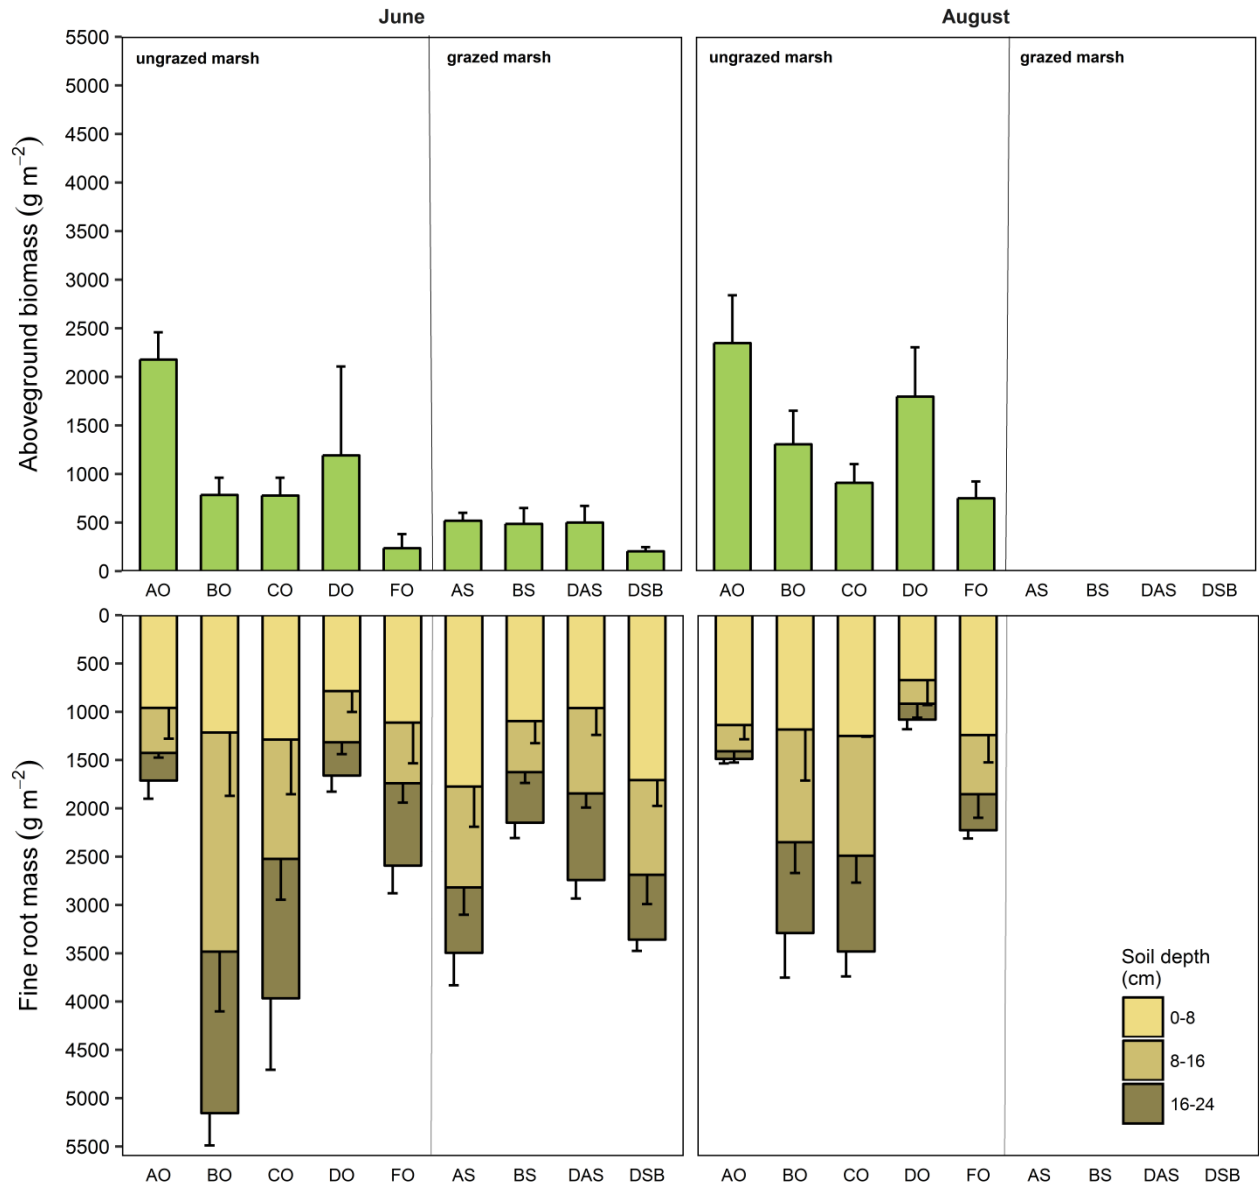

**Figure S2:** Above-ground vs. below-ground (fine root) biomass (dry weight) at nine plots in two saltmarsh sites (means  $\pm$  SD,  $n = 4-6$ ). Plot names with an “O” are located in an ungrazed salt marsh on the Hallig island Oland, plot names with an “S” are located in a grazed salt marsh at Sönke-Nissen-Koog (both are located in Schleswig-Holstein, Germany). The first letter of the plot name refers to the plant community: “AO”: *Elytrigia atherica* dominated (Oland), “BO”: *Spartina anglica* with *Aster tripolium* (Oland), “CO”: *Spartina anglica* dominated Oland, “DO”: *Atriplex portulacoides* dominated (Oland), “FO”: *Spartina anglica* dominated Oland, “AS” *Spartina anglica* dominated (Sönke-Nissen-Koog), “BS”: *Puccinellia maritima* dominated (Sönke-Nissen-Koog), “DAS”: *Spartina anglica* dominated at a scoured location (Sönke-Nissen-Koog), “DSB”: *Puccinellia maritima* dominated on an elevated location (Sönke-Nissen-Koog). Data collected by Rita Strieckmann (1989, unpublished).
