# Supplementary material for: Effects of Inundation, Nutrient Availability and Plant Species Diversity on Fine Root Mass and Morphology Across a Saltmarsh Flooding Gradient
Source: Front Plant Sci. 2018 Feb 6;9:98. doi: 10.3389/fpls.2018.00098 (PMC5808222; doi:10.3389/fpls.2018.00098)
Supplement: Supplementary file 2 [file Table2.pdf]

## Supplementary Material

### Effects of inundation, nutrient availability and plant species diversity on fine root mass and morphology across a saltmarsh flooding gradient

Regine Redelstein\*, Thomas Dinter, Dietrich Hertel, Christoph Leuschner

\* **Correspondence:** Regine Redelstein: regine.redelstein@biologie.uni-goettingen.de

#### Supplementary Material 2: Vegetation surveys of the sampling plots

**Table S2.1:** Vegetation cover estimated using the LONDO scale in the six replicate sampling plots of 2 x 2 m at the Westerhever site in the three saltmarsh zones (“Pio” = pioneer zone, “Low” = lower salt marsh, “Upp” = upper salt marsh).

| Plot                          | Pio1 | Pio2 | Pio3 | Pio4 | Pio5 | Pio6 | Low1 | Low2 | Low3 | Low4 | Low5 | Low6 | Upp1 | Upp2 | Upp3 | Upp4 | Upp5 | Upp6 |
|-------------------------------|------|------|------|------|------|------|------|------|------|------|------|------|------|------|------|------|------|------|
| <i>Elytrigia atherica</i>     |      |      |      |      |      |      |      | 0.4  | 0.1  | 0.1  | 0.2  | 0.1  | 10   | 10   | 10   | 10   | 10   | 10   |
| <i>Atriplex portulacoides</i> | 1    | 1    | 1    | 1    | 0.4  | 1    | 8    | 9    | 9    | 9    | 8    | 9    |      |      |      |      |      | 0.1  |
| <i>Spartina anglica</i>       | 9    | 9    | 9    | 9    | 9    | 9    | 0.1  | 0.1  | 0.1  | 0.1  | 0.1  | 0.1  |      |      |      |      |      |      |
| <i>Puccinellia maritima</i>   |      | 0.2  |      | 0.1  | 0.2  | 0.2  | 0.4  | 1    | 0.4  | 0.2  | 0.2  | 0.2  |      |      |      |      |      |      |
| <i>Suaeda maritima</i>        | 0.1  | 0.1  | 0.1  | 0.1  | 0.1  | 0.2  | 0.4  | 0.1  | 0.1  | 0.1  | 0.2  | 0.1  |      |      |      |      |      |      |
| <i>Triglochin maritima</i>    | 0.2  | 0.1  | 0.1  | 0.1  |      | 0.1  | 10   | 0.1  | 0.1  |      | 0.2  | 0.1  |      |      |      |      |      |      |
| <i>Aster tripolium</i>        |      | 0.1  | 0.1  | 0.1  | 0.1  | 0.1  | 0.2  | 0.1  | 0.1  | 0.1  | 0.1  | 0.1  |      |      |      |      |      |      |
| <i>Limonium vulgare</i>       |      |      | 0.1  |      |      |      | 0.2  | 0.1  | 0.2  | 0.1  | 0.1  | 0.1  |      |      |      |      |      |      |
| <i>Salicornia stricta</i>     | 0.1  | 0.1  | 0.1  |      |      | 0.1  | 0.1  |      |      | 0.1  | 0.1  |      |      |      |      |      |      |      |
| <i>Atriplex prostrata</i>     |      |      |      |      |      |      |      |      |      |      |      |      | 0.1  | 0.1  | 0.1  | 0.1  | 0.1  | 0.1  |
| <i>Cochlearia danica</i>      |      |      |      |      |      |      | 0.2  | 0.1  | 0.1  | 0.1  | 0.2  |      |      |      |      |      |      |      |
| <i>Atriplex littoralis</i>    |      |      | 0.1  | 0.1  | 0.1  | 0.1  |      |      |      |      |      |      |      |      |      |      |      |      |
| <i>Spergularia media</i>      |      |      |      |      |      |      | 0.1  |      | 0.1  | 0.1  |      |      |      |      |      |      |      |      |
| <i>Plantago maritima</i>      |      |      |      |      |      |      |      | 0.1  | 0.2  |      |      |      |      |      |      |      |      |      |
| <i>Artemisia maritima</i>     |      |      |      |      |      |      |      |      |      |      | 0.4  |      |      |      |      |      |      |      |
